# Supplementary material for: Synapsin III Regulates Dopaminergic Neuron Development in Vertebrates
Source: Cells. 2022 Dec 2;11(23):3902. doi: 10.3390/cells11233902 (PMC9739466; doi:10.3390/cells11233902)
Supplement: Supplementary file 1 [file cells-11-03902-s001.zip]

Archive with 7 entries (7 files):
- Supplementary Materials-Figure.pdf
- Video S1.mp4
- Video S2.mp4
- Video S3.mp4
- Video S4.mp4
- Video S5.mp4
- Video S6.mp4
